# Supplementary material for: Alcohol Consumption Patterns and Risk of Early-Onset Vasomotor Symptoms in Premenopausal Women
Source: MDPI journal article supplement (doi:10.3390/nu14112276), 2022-05-29
Supplement: s1 [file s1]

**Supplemental Table S1.** Cross-sectional and longitudinal association between alcohol consumption and risk of early-onset, moderately to severely bothersome VMS (overall and each components including hot flash or night sweat) among premenopausal women after further adjustment for hypertension and diabetes.

| Alcohol drinking patterns                | Multivariable-adjusted OR <sup>+</sup><br>(95% CI) |                    |                      | Multivariable-adjusted HR <sub>‡</sub><br>(95% CI) |                    |                      |
|------------------------------------------|----------------------------------------------------|--------------------|----------------------|----------------------------------------------------|--------------------|----------------------|
|                                          | Vasomotor symptoms                                 | Hot flush symptoms | Night sweat symptoms | Vasomotor symptoms                                 | Hot flush symptoms | Night sweat symptoms |
| <b>Lifetime drinking status</b>          |                                                    |                    |                      |                                                    |                    |                      |
| Lifetime abstainer                       | Reference                                          | Reference          | Reference            | Reference                                          | Reference          | Reference            |
| Current drinker                          |                                                    |                    |                      |                                                    |                    |                      |
| 0.1 to <10 g/day                         | 1.43 (1.02-2.00)                                   | 1.31 (0.92-1.87)   | 1.53 (0.88-2.68)     | 1.10 (0.85-1.41)                                   | 1.00 (0.75-1.35)   | 1.21 (0.89-1.64)     |
| 10 to <20 g/day                          | 1.98 (1.26-3.10)                                   | 1.72 (1.07-2.77)   | 2.79 (1.40-5.59)     | 1.03 (0.70-1.51)                                   | 0.82 (0.50-1.33)   | 1.11 (0.70-1.76)     |
| 20 to <40 g/day                          | 2.02 (1.17-3.50)                                   | 1.17 (0.61-2.25)   | 4.28 (2.03-9.04)     | 1.72 (1.06-2.79)                                   | 1.29 (0.71-2.37)   | 1.96 (1.13-3.42)     |
| ≥40 g/day                                | 3.47 (1.69-7.09)                                   | 2.02 (0.88-4.68)   | 8.00(3.26-19.63)     | 2.22 (1.17-4.23)                                   | 1.32 (0.52-3.33)   | 3.14 (1.57-6.28)     |
| <i>P</i> <sub>trend</sub>                | <0.01                                              | 0.06               | <0.01                | 0.02                                               | 0.69               | <0.01                |
| Former drinker                           | 1.06 (0.57-2.00)                                   | 1.06 (0.55-2.05)   | 1.65 (0.65-4.14)     | 1.27 (0.79-2.04)                                   | 1.06 (0.60-1.89)   | 1.15 (0.63-2.09)     |
| <b>Frequency of drinking (days/week)</b> |                                                    |                    |                      |                                                    |                    |                      |
| 0                                        | Reference                                          | Reference          | Reference            | Reference                                          | Reference          | Reference            |
| 1-2                                      | 1.44 (1.05-1.96)                                   | 1.31 (0.95-1.82)   | 1.56 (0.95-2.58)     | 1.07 (0.85-1.37)                                   | 1.00 (0.75-1.32)   | 1.18 (0.89-1.57)     |
| 3                                        | 2.08 (1.35-3.19)                                   | 1.58 (0.99-2.54)   | 3.01 (1.61-5.65)     | 1.49 (1.03-2.13)                                   | 1.32 (0.85-2.04)   | 1.61 (1.06-2.46)     |
| <i>P</i> <sub>trend</sub>                | <0.01                                              | 0.04               | <0.01                | 0.06                                               | 0.37               | 0.04                 |
| <b>Number of drinks a drinking day</b>   |                                                    |                    |                      |                                                    |                    |                      |
| 0                                        | Reference                                          | Reference          | Reference            | Reference                                          | Reference          | Reference            |
| 1-2                                      | 1.39 (1.01-1.93)                                   | 1.31 (0.93-1.84)   | 1.32 (0.79-2.22)     | 1.04 (0.81-1.33)                                   | 0.96 (0.72-1.28)   | 1.14 (0.85-1.54)     |
| 3-5                                      | 1.73 (1.21-2.48)                                   | 1.53 (1.05-2.23)   | 2.10 (1.21-3.65)     | 1.20 (0.90-1.59)                                   | 0.98 (0.70-1.39)   | 1.41 (1.00-1.97)     |
| ≥6                                       | 2.11 (1.34-3.34)                                   | 1.52 (0.91-2.54)   | 2.93 (1.51-5.68)     | 1.47 (1.00-2.17)                                   | 1.31 (0.82-2.09)   | 1.66 (1.05-2.62)     |

|                    |       |      |       |      |      |       |
|--------------------|-------|------|-------|------|------|-------|
| $P_{\text{trend}}$ | <0.01 | 0.03 | <0.01 | 0.03 | 0.44 | <0.01 |
|--------------------|-------|------|-------|------|------|-------|

Abbreviations: BMI, body mass index; CI, confidence interval; OR, odds ratio; HR, hazard ratio; VMS, vasomotor symptoms.

†Logistic regression model was used to calculate odds ratio and 95% confidence intervals for moderate-to-severe VMS.

‡ Parametric proportional hazard models were used to estimate hazard ratios (HRs) and 95% CIs for incident VMS.

The multivariable model was adjusted for age, attainment, smoking, physical activity level, BMI, hypertension, and diabetes in both cross-sectional and cohort studies.

**Supplemental Table S2.** Prevalence and incidence of early-onset, moderately to severely bothersome VMS among premenopausal women by frequency of binge drinking.

| Prevalence of vasomotor symptoms                                 | Vasomotor symptoms       |                                     | Hot flush symptoms       |                                     | Night sweat symptoms      |                                     |
|------------------------------------------------------------------|--------------------------|-------------------------------------|--------------------------|-------------------------------------|---------------------------|-------------------------------------|
|                                                                  | Age-adjusted OR (95% CI) | Multivariable-adjusted OR (95% CI)* | Age-adjusted OR (95% CI) | Multivariable-adjusted OR (95% CI)* | Age-adjusted OR (95% CI)  | Multivariable-adjusted OR (95% CI)* |
| <b>Frequency of binge drinking (<i>n</i> = 3322)<sup>†</sup></b> |                          |                                     |                          |                                     |                           |                                     |
| Never                                                            | Reference                | Reference                           | Reference                | Reference                           | Reference                 | Reference                           |
| <once a month                                                    | 1.36 (1.05-1.76)         | 1.30 (1.00-1.70)                    | 1.27 (0.96-1.67)         | 1.19 (0.90-1.59)                    | 1.76 (1.19-2.60)          | 1.71 (1.14-2.54)                    |
| once a month                                                     | 1.72 (1.16-2.56)         | 1.71 (1.15-2.56)                    | 1.53 (0.99-2.36)         | 1.47 (0.95-2.28)                    | 2.30 (1.31-4.06)          | 2.32 (1.30-4.13)                    |
| weekly or more                                                   | 1.60 (1.09-2.35)         | 1.45 (0.97-2.17)                    | 1.28 (0.83-1.98)         | 1.14 (0.72-1.79)                    | 2.71 (1.62-4.52)          | 2.42 (1.40-4.18)                    |
| <i>P</i> <sub>trend</sub>                                        | <0.01                    | <0.01                               | 0.04                     | 0.15                                | <0.01                     | <0.01                               |
| Incidence of vasomotor symptoms                                  | Vasomotor symptoms       |                                     | Hot flush symptoms       |                                     | Night sweat symptoms      |                                     |
|                                                                  | Age-adjusted HR (95% CI) | Multivariable-adjusted HR (95% CI)* | Age-adjusted HR (95% CI) | Multivariable-adjusted HR (95% CI)* | Age-adjusted HRs (95% CI) | Multivariable-adjusted HR (95% CI)* |
| <b>Frequency of binge drinking (<i>n</i> = 1906)<sup>‡</sup></b> |                          |                                     |                          |                                     |                           |                                     |
| Never                                                            | Reference                | Reference                           | Reference                | Reference                           | Reference                 | Reference                           |
| <once a month                                                    | 1.00 (0.79-1.26)         | 0.98 (0.77-1.23)                    | 0.97 (0.73-1.29)         | 0.94 (0.70-1.26)                    | 1.01 (0.77-1.32)          | 0.99 (0.75-1.30)                    |
| once a month                                                     | 1.42 (1.00-1.02)         | 1.35 (0.95-1.91)                    | 1.31 (0.84-2.04)         | 1.27 (0.81-1.98)                    | 1.50 (1.01-2.23)          | 1.39 (0.93-2.08)                    |
| weekly or more                                                   | 1.57 (1.12-2.21)         | 1.54 (1.08-2.19)                    | 1.45 (0.95-2.22)         | 1.45 (0.93-2.25)                    | 1.67 (1.13-2.45)          | 1.58 (1.06-2.35)                    |
| <i>P</i> <sub>trend</sub>                                        | 0.01                     | 0.01                                | 0.08                     | 0.12                                | <0.01                     | 0.02                                |

Abbreviations: BMI, body mass index; CI, confidence interval; OR, odds ratio; HR, hazard ratio; VMS, vasomotor symptoms.

<sup>†</sup>Logistic regression models with robust variance were used to estimate odds ratios (ORs) and 95% CIs for prevalent VMS.

<sup>‡</sup>Parametric proportional hazard models were used to estimate hazard ratios (HRs) and 95% CIs for incident VMS.

\*Multivariable model was adjusted for age, education level, physical activity, BMI, and smoking status in both cross-sectional and cohort studies.

**Supplemental Table S3.** Cohort study characteristics of premenopausal women without vasomotor symptoms at baseline by drinking category (n=2,394).

| Characteristics                         | Total            | Drinking status    |                   |                  |                   |                   |                  |
|-----------------------------------------|------------------|--------------------|-------------------|------------------|-------------------|-------------------|------------------|
|                                         |                  | Lifetime abstainer | Former drinker    | 0 to <10 g/day   | 10 to <20 g/day   | 20 to <40 g/day   | ≥40 g/day        |
| Number (%)                              | 2,394 (100)      | 323 (13.5)         | 103 (4.3)         | 1,687 (70.5)     | 185 (7.7)         | 71 (3.0)          | 25 (1.0)         |
| Age (years)*                            | 44.6 ± 2.3       | 45.3 ± 2.5         | 44.9 ± 2.5        | 44.5 ± 2.3       | 44.5 ± 2.2        | 44.6 ± 2.4        | 44.4 ± 2.7       |
| Age at menarche (years)*                | 13.9 ± 1.4       | 14.0 ± 1.4         | 13.8 ± 1.4        | 13.9 ± 1.4       | 13.9 ± 1.4        | 13.9 ± 1.3        | 14.0 ± 1.7       |
| Obesity (%) <sup>a</sup>                | 15.6             | 16.1               | 25.2              | 14.9             | 16.2              | 15.5              | 12.0             |
| High physical activity (%) <sup>b</sup> | 14.9             | 11.8               | 13.6              | 14.5             | 18.9              | 29.6              | 16.0             |
| Current smoker (%)                      | 1.4              | 0.0                | 0.0               | 1.1              | 2.8               | 11.4              | 8.0              |
| High education (%) <sup>c</sup>         | 81.8             | 82.0               | 82.4              | 83.0             | 76.4              | 69.6              | 72.0             |
| Hypertension (%) <sup>d</sup>           | 3.2              | 5.3                | 1.0               | 2.7              | 3.2               | 8.5               | 8.0              |
| Systolic BP (mmHg)*                     | 103.2 ± 11.1     | 103.7 ± 11.4       | 103.5 ± 11.3      | 102.8 ± 11.0     | 103.7 ± 10.2      | 107.7 ± 13.6      | 108.3 ± 10.8     |
| Diastolic BP (mmHg)*                    | 66.3 ± 8.6       | 66.0 ± 8.5         | 64.9 ± 9.6        | 66.1 ± 8.4       | 67.2 ± 8.6        | 70.2 ± 10.8       | 72.1 ± 9.7       |
| Diabetes (%) <sup>e</sup>               | 1.7              | 1.6                | 0.0               | 1.6              | 2.2               | 4.2               | 4.0              |
| Glucose (mg/dL)*                        | 92.6 ± 11.2      | 92.1 ± 10.0        | 91.5 ± 7.5        | 92.4 ± 11.3      | 94.2 ± 8.8        | 98.3 ± 20.0       | 93.3 ± 8.1       |
| LDLC (mg/dL)*                           | 118.3 ± 28.6     | 122.6 ± 28.6       | 120.3 ± 30.1      | 117.6 ± 27.9     | 118.8 ± 29.7      | 114.9 ± 34.3      | 103.5 ± 34.9     |
| HDLC (mg/dL)*                           | 67.5 ± 16.0      | 65.7 ± 15.7        | 65.4 ± 14.7       | 67.2 ± 15.8      | 69.7 ± 16.2       | 74.2 ± 18.2       | 82.5 ± 21.4      |
| Triglycerides (mg/dL) <sup>+</sup>      | 73.0 (56.0-99.0) | 74.0 (56.0-104.0)  | 75.0 (55.0-104.0) | 71.0 (56.0-96.0) | 81.0 (58.0-104.0) | 80.0 (62.0-105.0) | 77.0 (60.0-90.5) |
| AST (U/l) <sup>+</sup>                  | 17.0 (15.0-20.0) | 18.0 (15.0-20.0)   | 18.0 (16.0-20.0)  | 17.0 (15.0-20.0) | 17.0 (15.0-20.0)  | 19.0 (16.0-21.0)  | 18.0 (16.0-19.0) |
| ALT (U/l) <sup>+</sup>                  | 13.0 (11.0-17.0) | 14.0 (11.0-17.0)   | 14.0 (11.0-18.0)  | 13.0 (11.0-17.0) | 13.0 (11.0-17.0)  | 13.0 (12.0-17.0)  | 14.0 (11.0-16.0) |
| GGT (U/l) <sup>+</sup>                  | 13.0 (10.0-18.0) | 13.0 (10.0-17.0)   | 14.0 (11.0-17.0)  | 13.0 (10.0-17.0) | 15.0 (12.0-21.0)  | 15.0 (11.0-20.0)  | 18.0 (15.0-31.0) |
| HOMA-IR <sup>+</sup>                    | 1.1 (0.7-1.6)    | 1.0 (0.7-1.5)      | 1.1 (0.8-1.9)     | 1.1 (0.7-1.6)    | 1.2 (0.8-1.6)     | 1.1 (0.8-1.4)     | 0.8 (0.5-1.0)    |
| hsCRP (mg/L) <sup>+</sup>               | 0.03 (0.02-0.06) | 0.03 (0.02-0.06)   | 0.03 (0.02-0.05)  | 0.03 (0.02-0.06) | 0.03 (0.02-0.06)  | 0.04 (0.02-0.08)  | 0.03 (0.02-0.06) |

Abbreviations: MET, metabolic equivalents; AST, aspartate aminotransferase; ALT, alanine aminotransferase; BP, blood pressure; GGT, gamma-glutamyl transpeptidase; HDL-C, high-density lipoprotein cholesterol; HOMA-IR, homeostasis model assessment of insulin resistance; hsCRP, high-sensitivity C-reactive protein; LDLC, low-density lipoprotein cholesterol

Data presented as \*mean  $\pm$  standard deviation, †median (interquartile range), or percentage.

<sup>a</sup> body mass index  $\geq 25\text{kg/m}^2$ ; <sup>b</sup> defined as either  $> 3$  days of vigorous activities achieving at least 1500 MET min/week, or  $> 7$  days of any combination of walking and moderate or vigorous activities achieving at least 3000 MET min/week; <sup>c</sup>  $\geq$  college graduate; <sup>d</sup> defined as either blood pressure  $\geq 140/90$  mmHg, history of physician-diagnosed hypertension, or antihypertensive medication use; <sup>e</sup> glucose-lowering medication use, fasting hyperglycemia based on either serum glucose of  $\geq 126$  mg/dL, or glycated hemoglobin of  $\geq 6.5\%$

**Supplemental Table S4.** Longitudinal association between alcohol consumption and incidence of early-onset bothersome vasomotor symptoms among premenopausal women by alcohol flushing.

| Alcohol drinking patterns                     | Person-Years | Incident cases | Incidence rate<br>(Cases per 100 PY) | Age-adjusted HRs (95% CI) | Multivariable-adjusted HR<br>(95% CI)* |
|-----------------------------------------------|--------------|----------------|--------------------------------------|---------------------------|----------------------------------------|
| <b>Alcohol non-flushers (<i>n</i> = 1631)</b> |              |                |                                      |                           |                                        |
| Lifetime abstainer                            | 642.1        | 28             | 4.4                                  | Reference                 | Reference                              |
| Current drinker                               |              |                |                                      |                           |                                        |
| 0.1 to <10 g/day                              | 5517.5       | 257            | 4.7                                  | 1.19 (0.81—1.76)          | 1.24 (0.84—1.84)                       |
| 10 to <20 g/day                               | 760.0        | 38             | 5.0                                  | 1.30 (0.80—2.12)          | 1.21 (0.74—1.98)                       |
| 20 to <40 g/day                               | 287.1        | 20             | 7.0                                  | 1.86 (1.05—3.31)          | 1.82 (1.01—3.28)                       |
| ≥40 g/day                                     | 104.1        | 9              | 8.6                                  | 2.52 (1.18—5.37)          | 2.38 (1.11—5.11)                       |
| <i>P</i> <sub>trend</sub>                     |              |                |                                      | <0.01                     | 0.02                                   |
| Former drinker                                | 246.1        | 14             | 5.6                                  | 1.48 (0.78—2.82)          | 1.50 (0.79—2.87)                       |
| <b>Alcohol flushers (<i>n</i> = 713)</b>      |              |                |                                      |                           |                                        |
| Lifetime abstainer                            | 752.2        | 35             | 4.7                                  | Reference                 | Reference                              |
| Current drinker                               |              |                |                                      |                           |                                        |
| 0.1 to <10 g/day                              | 2338.4       | 115            | 4.9                                  | 1.24 (0.84—1.85)          | 1.21 (0.82—1.79)                       |
| 10 to <20 g/day                               | 82.8         | 2              | 2.4                                  | 0.66 (0.16—2.77)          | 0.71 (0.17—2.96)                       |
| 20 to <40 g/day                               | 24.6         | 2              | 8.1                                  | 2.59 (0.61—10.89)         | 2.40 (0.54—10.71)                      |
| ≥40 g/day                                     | 16.8         | 2              | 11.9                                 | 2.06 (0.49—8.67)          | 2.44 (0.55—10.93)                      |
| <i>P</i> <sub>trend</sub>                     |              |                |                                      | 0.20                      | 0.21                                   |
| Former drinker                                | 137.1        | 8              | 5.8                                  | 1.44 (0.66—3.11)          | 1.24 (0.56—2.71)                       |

Abbreviations: CI, confidence interval; HR, hazard ratio; PY, person-years; VMS, vasomotor symptoms

*P*=0.87 for interaction between alcohol consumption and alcohol flushing response for moderate-to-severe VMS.

\* Estimated from parametric proportional hazard models. The multivariable model was adjusted for age, attainment, smoking, physical activity level, BMI, hypertension, and diabetes
